# Supplementary material for: Microvascular Density Analysis of Patients with Inactive Systemic Lupus Erythematosus—A Two-Year Follow-Up Optical Coherence Tomography Angiography Study
Source: MDPI journal article supplement (doi:10.3390/jcm13102979), 2024-05-18
Supplement: s1 [file s1]

**Table S1.** Correlation analysis for the whole study group, the high-risk group and the low risk group for the differences between two years and baseline ( $\Delta_{t1-t0}$ ) for the hydroxychloroquine (HCQ) cumulative doses and  $\Delta_{t1-t0}$  of the vessel densities in the regions indicated.

| <b>Whole Study Group</b>                    |            |                                              |                                              |                        |
|---------------------------------------------|------------|----------------------------------------------|----------------------------------------------|------------------------|
| <b>(n = 24)</b>                             |            |                                              |                                              |                        |
|                                             |            | $\Delta_{t1-t0}$ VD SCP <i>whole en-face</i> | $\Delta_{t1-t0}$ VD DCP <i>whole en-face</i> | $\Delta_{t1-t0}$ VD CC |
| $\Delta_{t1-t0}$<br>cumulative<br>HCQ doses | r (95% CI) | 0.062 (-0.367; 0.477)                        | 0.246 (-0.143; 0.576)                        | -0.182 (-0.681; 0.317) |
| <b>High-Risk Group</b>                      |            |                                              |                                              |                        |
| <b>(n = 12)</b>                             |            |                                              |                                              |                        |
|                                             |            | $\Delta_{t1-t0}$ VD SCP <i>whole en-face</i> | $\Delta_{t1-t0}$ VD DCP <i>whole en-face</i> | $\Delta_{t1-t0}$ CC    |
| $\Delta_{t1-t0}$<br>cumulative<br>HCQ doses | r (95% CI) | 0.119 (-0.604; 0.796)                        | 0.301 (-0.335; 0.706)                        | 0.182 (-0.590; 0.746)  |
| <b>Low-Risk Group</b>                       |            |                                              |                                              |                        |
| <b>(n = 12)</b>                             |            |                                              |                                              |                        |
|                                             |            | $\Delta_{t1-t0}$ VD SCP <i>whole en-face</i> | $\Delta_{t1-t0}$ VD DCP <i>whole en-face</i> | $\Delta_{t1-t0}$ CC    |
| $\Delta_{t1-t0}$<br>cumulative<br>HCQ doses | r (95% CI) | -0.063 (-0.696; 0.602)                       | -0.238 (-0.810; 0.596)                       | -0.627 (-0.929; 0.052) |

DCP = deep retinal capillary plexus, HCQ = hydroxychloroquine, SCP = superficial retinal capillary plexus, VD = vessel density, r = Spearman's correlation coefficient, 95% CI = 95% confidence interval. Displayed are the Spearman's rank correlation coefficients (r) and 95% bias-corrected and accelerated (BCa) bootstrap confidence intervals (CI) using 50.000 samples. High-risk group: HCQ therapy duration > 5 years, low risk group: HCQ therapy duration ≤ 5 years.
